# Supplementary material
Source: Springer Nature journal article supplement (https://www.springermedizin.de/resource/supplementary/12876_2011_697_MOESM2_ESM.pdf/9437536)

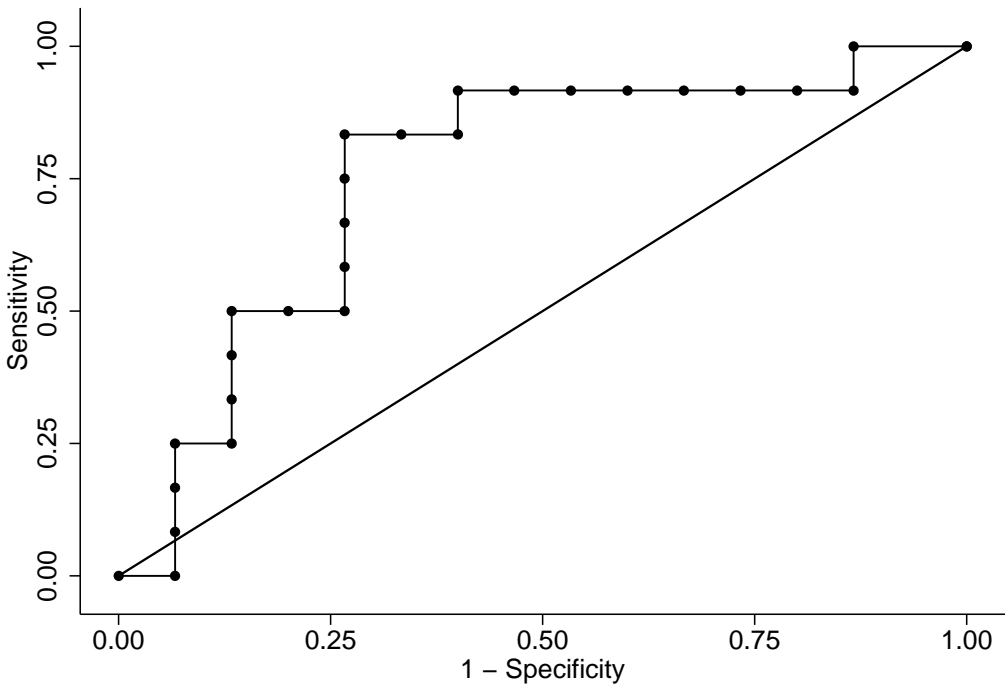

Area under ROC curve = 0.7556

Supplement: MOESM2 [file 9437536]
